# Supplementary material for: Kinetic Controlled Glass Transition Measurement of Organic Aerosol Thin FilmsUsing Broadband Dielectric Spectroscopy
Source: Copernicus journal article supplement (doi:10.5194/amt-2017-425), 2018-01-29
Supplement: Supplementary file 1 [file amt-2017-425-supplement.pdf]

1 **SUPPORTING INFORMATION**

2 **Kinetic Controlled Glass Transition Measurement of Organic Aerosol Thin**  
3 **Films Using Broadband Dielectric Spectroscopy**

4 Yue Zhang<sup>1,2,£</sup>, Shachi Katira<sup>3</sup>, Andrew Lee<sup>1,†</sup>, Andrew T. Lambe<sup>2</sup>, Timothy B. Onasch<sup>1,2</sup>, Wen  
5 Xu<sup>2</sup>, Manjula R. Canagaratna<sup>2</sup>, Andrew Freedman<sup>2</sup>, John T. Jayne<sup>2</sup>, Doug R. Worsnop<sup>2</sup>, Paul  
6 Davidovits<sup>1,\*</sup>, David Chandler<sup>3,§</sup>, Charles E. Kolb<sup>2,\*</sup>

7

8 *1 Department of Chemistry, Boston College, Chestnut Hill, MA, 02459*

9 *2 Aerodyne Research Inc., Billerica, MA, 01821*

10 *3 Department of Chemistry, University of California, Berkeley, CA, 94720*

11 *£ Now at Department of Environmental Science and Engineering, Gillings School of*  
12 *Global Public Health, University of North Carolina at Chapel Hill*

13 *† Now at Department of Chemistry, University of North Carolina at Chapel Hill*

14 *§ Deceased April 2017*

15

16

17

18

19

20

21 No. of pages: 2

22 No. of figures: 1

23

## 24 Havriliak-Negami Equation and Fitting Principles

25 The real part of the Havriliak-Negami equation,  $\varepsilon'(\omega)$ , is shown as:

$$26 \quad \varepsilon'(\omega) = \varepsilon_{\infty} + \Delta\varepsilon(1 + 2(\omega\tau)^{\alpha} \cos\left(\frac{\pi\alpha}{2}\right) + (\omega\tau)^{2\alpha})^{-\beta/2} \cos(\beta\varphi) \quad (\text{S1})$$

27 where  $\varepsilon_{\infty}$  is the permittivity at the high frequency limit,  $\alpha$ ,  $\beta$  are fitting parameters, and  $\tau$   
28 is the characteristic relaxation time of the medium.

29 The imaginary part of the Havriliak-Negami,  $\varepsilon''(\omega)$ , is shown in Eq. (2). Sometimes,  
30 when there are ionic impurities in the supercooled liquid, a dc-conductivity term that follows  
31 strictly through  $\omega^{-1}$  can contribute to the imaginary part as well (Adrjanowicz et al., 2009). The  
32 imaginary part of the of the Havriliak-Negami equation is re-written as:

$$33 \quad \varepsilon''(\omega) = \frac{\sigma_{dc}}{\varepsilon_0\omega} + \Delta\varepsilon(1 + 2(\omega\tau)^{\alpha} \cos\left(\frac{\pi\alpha}{2}\right) + (\omega\tau)^{2\alpha})^{-\beta/2} \sin(\beta\varphi) \quad (\text{S2})$$

34 where  $\sigma_{dc}$  is the conductivity of the supercooled liquid,  $\varepsilon_0$  is a permittivity constant.

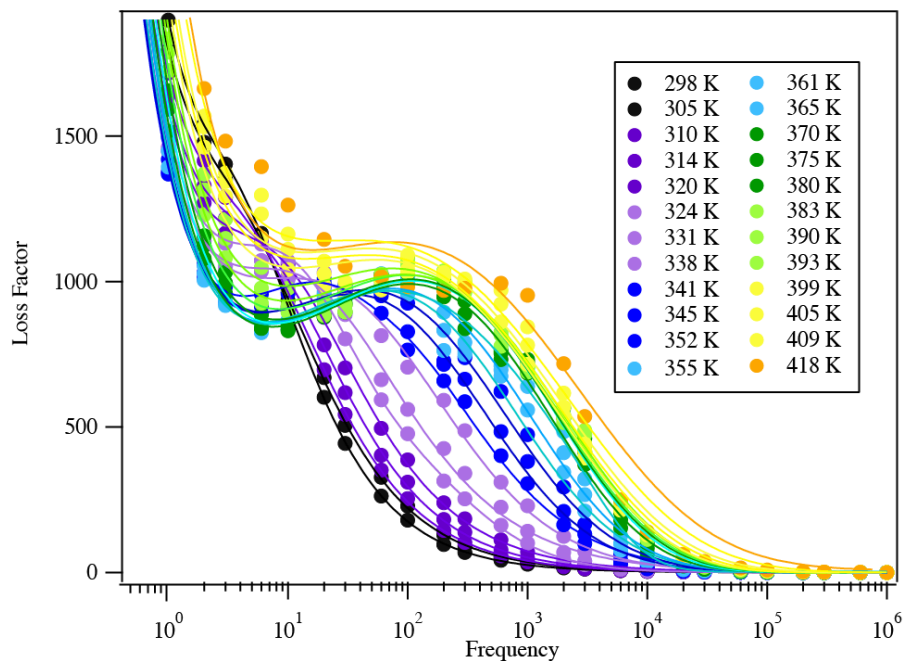

35

36 **Figure S1.** The dielectric relaxation spectrum of citric acid at different temperatures. The solid  
 37 circles are measurement experimental data and the solid lines are fitting curves parameterized  
 38 from Eq. (S2) and Adrjanowicz et al. (2009).

39
